# Supplementary material
Source: HighWire-hosted journal article supplement (https://jcp.bmj.com/content/74/5/314)
Supplement: inline-supplementary-material-1 [file inline-supplementary-material-1.pdf]

Supplemental Table 1. The amount of input DNA and conformity degree of 10% RMs

| Mutations           | Cell line  | Frequency | Input DNA (ng) | Theoretical concentration (ng/ml) | Extraction concentration (ng/ml) | Conformity degree |
|---------------------|------------|-----------|----------------|-----------------------------------|----------------------------------|-------------------|
| KRAS p.G12D         | LS180      | 45.52%    | 1144           | 8.4                               | 9.6                              | 1.2               |
| KRAS p.G12C         | NCI-H23    | 75.32%    | 622            | 7.5                               | 7.9                              | 1.1               |
| KRAS p.G12A         | SW1116     | 61.65%    | 787            | 7.8                               | 7.6                              | 1.0               |
| KRAS p.G13D         | HCT-15     | 46.41%    | 1116           | 8.3                               | 8.6                              | 1.0               |
| KRAS p.G12S         | A549       | 100.00%   | 451            | 7.2                               | 8.4                              | 1.2               |
| KRAS p.G13C         | NCI-H1355  | 47.04%    | 1097           | 8.3                               | 10.8                             | 1.3               |
| NRAS p.Q61K         | NCI-H2087  | 30.35%    | 1996           | 9.7                               | 10.4                             | 1.1               |
| NRAS p.Q61R         | A2058      | 30.19%    | 2012           | 9.7                               | 13.7                             | 1.4               |
| BRAF p.V600E        | NCI-H1395  | 96.63%    | 469            | 7.2                               | 11.9                             | 1.6               |
| BRAF p.G469A        | NCI-H2087  | 38.76%    | 1413           | 8.8                               | 11.2                             | 1.3               |
| BRAF p.L597V        | T84        | 71.10%    | 665            | 7.6                               | 10.1                             | 1.3               |
| PIK3CA p.E542K      | MDA-MB-453 | 66.50%    | 719            | 7.7                               | 11.4                             | 1.5               |
| PIK3CA p.E545K      | GP2D       | 48.00%    | 1069           | 8.2                               | 10.5                             | 1.3               |
| PIK3CA p.H1047R     | NCI-1975   | 75.78%    | 618            | 7.6                               | 10.2                             | 1.3               |
| PIK3CA p.H1047L     | SW48       | 28.77%    | 2164           | 10.1                              | 12.2                             | 1.2               |
| EGFR p.T790M        | HCC 2935   | 45        | 790            | 9.0                               | 8.3                              | 0.9               |
| EGFR p.G719S        | HCC827     | 25        | 1777           | 7.7                               | 7.8                              | 1.0               |
| EGFR p.L858R        | Hs 746T    | 16.17%    | 6584           | 9.75                              | 9.8                              | 1.0               |
| EGFR p.E746_A750del | NCI-H2347  | 99.88%    | 452            | 7.2                               | 9.7                              | 1.3               |
| EGFR p.L747_E749del | NCI-H596   | 47.98%    | 535            | 8.3                               | 10.9                             | 1.3               |
| EGFR p.E746_S752>I  | NCI-1975   | 70.50%    | 671            | 7.6                               | 9.6                              | 1.3               |
| EGFR gain           | HCC827     | 60.06%    | 36             | 7.7                               | 7.8                              | 1.0               |
| MET gain            | HCC 4006   | 62.49%    | 344            | 7.7                               | 8.0                              | 1.0               |

Supplementary table 2. Information of the RMs

| Sample ID | mutations   | Designed frequency | AA change | Cosmic ID | Reference type | Other mutations                  |
|-----------|-------------|--------------------|-----------|-----------|----------------|----------------------------------|
| CP-000    | Wide type   | /                  | /         | /         | Negative       | /                                |
| CP_001_01 | KRAS p.G12D | 3.00%              | p.G12D    | COSM521   | Positive       | PIK3CA:p.H1047R                  |
| CP_001_02 | KRAS p.G12D | 1.00%              | p.G12D    | COSM521   | LOD            | PIK3CA:p.H1047R                  |
| CP_001_03 | KRAS p.G12D | 0.30%              | p.G12D    | COSM521   | LOD            | PIK3CA:p.H1047R                  |
| CP_001_04 | KRAS p.G12D | 0.10%              | p.G12D    | COSM521   | LOD            | PIK3CA:p.H1047R                  |
| CP_003_01 | KRAS p.G12C | 3.00%              | p.G12C    | COSM516   | positive       | /                                |
| CP_003_02 | KRAS p.G12C | 1.00%              | p.G12C    | COSM516   | LOD            | /                                |
| CP_003_03 | KRAS p.G12C | 0.30%              | p.G12C    | COSM516   | LOD            | /                                |
| CP_003_04 | KRAS p.G12C | 0.10%              | p.G12C    | COSM516   | LOD            | /                                |
| CP_004_01 | KRAS p.G12A | 3.00%              | p.G12A    | COSM522   | positive       | /                                |
| CP_004_02 | KRAS p.G12A | 1.00%              | p.G12A    | COSM522   | LOD            | /                                |
| CP_004_03 | KRAS p.G12A | 0.30%              | p.G12A    | COSM522   | LOD            | /                                |
| CP_004_04 | KRAS p.G12A | 0.10%              | p.G12A    | COSM522   | LOD            | /                                |
| CP_005_01 | KRAS p.G13D | 3.00%              | p.G13D    | COSM532   | positive       | PIK3CA:p.E545K<br>PIK3CA:p.D549N |
| CP_005_02 | KRAS p.G13D | 1.00%              | p.G13D    | COSM532   | LOD            | PIK3CA:p.E545K<br>PIK3CA:p.D549N |
| CP_005_03 | KRAS p.G13D | 0.30%              | p.G13D    | COSM532   | LOD            | PIK3CA:p.E545K<br>PIK3CA:p.D549N |
| CP_005_04 | KRAS p.G13D | 0.10%              | p.G13D    | COSM532   | LOD            | PIK3CA:p.E545K<br>PIK3CA:p.D549N |
| CP_006_01 | KRAS p.G12S | 3.00%              | p.G12S    | COSM517   | positive       | /                                |
| CP_006_02 | KRAS p.G12S | 1.00%              | p.G12S    | COSM517   | LOD            | /                                |
| CP_006_03 | KRAS p.G12S | 0.30%              | p.G12S    | COSM517   | LOD            | /                                |
| CP_006_04 | KRAS p.G12S | 0.10%              | p.G12S    | COSM517   | LOD            | /                                |
| CP_007_01 | KRAS p.G13C | 3.00%              | p.G13C    | COSM527   | positive       | /                                |
| CP_007_02 | KRAS p.G13C | 1.00%              | p.G13C    | COSM527   | LOD            | /                                |
| CP_007_03 | KRAS p.G13C | 0.30%              | p.G13C    | COSM527   | LOD            | /                                |
| CP_007_04 | KRAS p.G13C | 0.10%              | p.G13C    | COSM527   | LOD            | /                                |
| CP_009_01 | NRAS p.Q61K | 3.00%              | p.Q61K    | COSM580   | positive       | BRAF:p.L597V<br>TP53:p.V157F     |
| CP_009_02 | NRAS p.Q61K | 1.00%              | p.Q61K    | COSM580   | LOD            | BRAF:p.L597V<br>TP53:p.V157F     |
| CP_009_03 | NRAS p.Q61K | 0.30%              | p.Q61K    | COSM580   | LOD            | BRAF:p.L597V<br>TP53:p.V157F     |
| CP_009_04 | NRAS p.Q61K | 0.10%              | p.Q61K    | COSM580   | LOD            | BRAF:p.L597V<br>TP53:p.V157F     |
| CP_010_01 | NRAS p.Q61R | 3.00%              | p.Q61R    | COSM584   | positive       | /                                |
| CP_010_02 | NRAS p.Q61R | 1.00%              | p.Q61R    | COSM584   | LOD            | /                                |

|           |                    |       |          |          |          |                             |
|-----------|--------------------|-------|----------|----------|----------|-----------------------------|
| CP_010_03 | NRAS p.Q61R        | 0.30% | p.Q61R   | COSM584  | LOD      | /                           |
| CP_010_04 | NRAS p.Q61R        | 0.10% | p.Q61R   | COSM584  | LOD      | /                           |
| CP_011_01 | BRAF p.V600E       | 3.00% | p.V600E  | COSM476  | positive | MAP2K1:p.P124S              |
| CP_011_02 | BRAF p.V600E       | 1.00% | p.V600E  | COSM476  | LOD      | MAP2K1:p.P124S              |
| CP_011_03 | BRAF p.V600E       | 0.30% | p.V600E  | COSM476  | LOD      | MAP2K1:p.P124S              |
| CP_011_04 | BRAF p.V600E       | 0.10% | p.V600E  | COSM476  | LOD      | MAP2K1:p.P124S              |
| CP_012_01 | BRAF p.469A        | 3.00% | p.G469A  | COSM460  | positive | /                           |
| CP_012_02 | BRAF p.469A        | 1.00% | p.G469A  | COSM460  | LOD      | /                           |
| CP_012_03 | BRAF p.469A        | 0.30% | p.G469A  | COSM460  | LOD      | /                           |
| CP_012_04 | BRAF p.469A        | 0.10% | p.G469A  | COSM460  | LOD      | /                           |
| CP_013_01 | BRAF p.L597V       | 3.00% | p.L597V  | COSM470  | positive | NRAS:p.Q61K<br>TP53:p.V157F |
| CP_013_02 | BRAF p.L597V       | 1.00% | p.L597V  | COSM470  | LOD      | NRAS:p.Q61K<br>TP53:p.V157F |
| CP_013_03 | BRAF p.L597V       | 0.30% | p.L597V  | COSM470  | LOD      | NRAS:p.Q61K<br>TP53:p.V157F |
| CP_013_04 | BRAF p.L597V       | 0.10% | p.L597V  | COSM470  | LOD      | NRAS:p.Q61K<br>TP53:p.V157F |
| CP_014_01 | PI3KCA p.E542K     | 3.00% | p.E542K  | COSM760  | positive | KRAS:p.G13D                 |
| CP_014_02 | PI3KCA p.E542K     | 1.00% | p.E542K  | COSM760  | LOD      | KRAS:p.G13D                 |
| CP_014_03 | PI3KCA p.E542K     | 0.30% | p.E542K  | COSM760  | LOD      | KRAS:p.G13D                 |
| CP_014_04 | PI3KCA p.E542K     | 0.10% | p.E542K  | COSM760  | LOD      | KRAS:p.G13D                 |
| CP_015_01 | PIK3CA p.E545K     | 3.00% | p.E545K  | COSM763  | positive | MET:c.3082+1G>T             |
| CP_015_02 | PIK3CA p.E545K     | 1.00% | p.E545K  | COSM763  | LOD      | MET:c.3082+1G>T             |
| CP_015_03 | PIK3CA p.E545K     | 0.30% | p.E545K  | COSM763  | LOD      | MET:c.3082+1G>T             |
| CP_015_04 | PIK3CA p.E545K     | 0.10% | p.E545K  | COSM763  | LOD      | MET:c.3082+1G>T             |
| CP_016_01 | PIK3CA<br>p.H1047R | 3.00% | p.H1047R | COSM775  | positive | /                           |
| CP_016_02 | PIK3CA<br>p.H1047R | 1.00% | p.H1047R | COSM775  | LOD      | /                           |
| CP_016_03 | PIK3CA<br>p.H1047R | 0.30% | p.H1047R | COSM775  | LOD      | /                           |
| CP_016_04 | PIK3CA<br>p.H1047R | 0.10% | p.H1047R | COSM775  | LOD      | /                           |
| CP_017_01 | PIK3CA<br>p.H1047L | 3.00% | p.H1047L | COSM776  | positive | KRAS:p.G12D                 |
| CP_017_02 | PIK3CA<br>p.H1047L | 1.00% | p.H1047L | COSM776  | LOD      | KRAS:p.G12D                 |
| CP_017_03 | PIK3CA<br>p.H1047L | 0.30% | p.H1047L | COSM776  | LOD      | KRAS:p.G12D                 |
| CP_017_04 | PIK3CA<br>p.H1047L | 0.10% | p.H1047L | COSM776  | LOD      | KRAS:p.G12D                 |
| CP_018_01 | EGFR p.T790M       | 3.00% | p.T790M  | COSM6240 | positive | EGFR:p.L858R TP53           |

|           |                              |       |                    |           |          |                 |      |
|-----------|------------------------------|-------|--------------------|-----------|----------|-----------------|------|
|           |                              |       |                    |           |          | p.R273H         |      |
| CP_018_02 | EGFR p.T790M                 | 1.00% | p.T790M            | COSM6240  | LOD      | EGFR:p.L858R    | TP53 |
|           |                              |       |                    |           |          | p.R273H         |      |
| CP_018_03 | EGFR p.T790M                 | 0.30% | p.T790M            | COSM6240  | LOD      | EGFR:p.L858R    | TP53 |
|           |                              |       |                    |           |          | p.R273H         |      |
| CP_018_04 | EGFR p.T790M                 | 0.10% | p.T790M            | COSM6240  | LOD      | EGFR:p.L858R    | TP53 |
|           |                              |       |                    |           |          | p.R273H         |      |
| CP_019_01 | EGFR p.G719S                 | 3.00% | p.G719S            | COSM6252  | positive | MAP2K1:p.Q56P   |      |
| CP_019_02 | EGFR p.G719S                 | 1.00% | p.G719S            | COSM6252  | LOD      | MAP2K1:p.Q56P   |      |
| CP_019_03 | EGFR p.G719S                 | 0.30% | p.G719S            | COSM6252  | LOD      | MAP2K1:p.Q56P   |      |
| CP_019_04 | EGFR p.G719S                 | 0.10% | p.G719S            | COSM6252  | LOD      | MAP2K1:p.Q56P   |      |
| CP_020_01 | EGFR p.L858R                 | 3.00% | p.L858R            | COSM6224  | positive | EGFR:p.T790M    | TP53 |
|           |                              |       |                    |           |          | p.R273H         |      |
| CP_020_02 | EGFR p.L858R                 | 1.00% | p.L858R            | COSM6224  | LOD      | EGFR:p.T790M    | TP53 |
|           |                              |       |                    |           |          | p.R273H         |      |
| CP_020_03 | EGFR p.L858R                 | 0.30% | p.L858R            | COSM6224  | LOD      | EGFR:p.T790M    | TP53 |
|           |                              |       |                    |           |          | p.R273H         |      |
| CP_020_04 | EGFR p.L858R                 | 0.10% | p.L858R            | COSM6224  | LOD      | EGFR:p.T790M    | TP53 |
|           |                              |       |                    |           |          | p.R273H         |      |
| CP_022_01 | EGFR<br>p.E746A750del        | 3.00% | p.E746_A750del     | COSM6225  | positive | /               |      |
| CP_022_02 | EGFR<br>p.E746A750del        | 1.00% | p.E746_A750del     | COSM6225  | LOD      | /               |      |
| CP_022_03 | EGFR<br>p.E746A750del        | 0.30% | p.E746_A750del     | COSM6225  | LOD      | /               |      |
| CP_022_04 | EGFR<br>p.E746A750del        | 0.10% | p.E746_A750del     | COSM6225  | LOD      | /               |      |
| CP_023_01 | EGFR<br>p.L747_A750>P        | 3.00% | p.L747_E749del     | COSM12382 | positive | /               |      |
| CP_023_02 | EGFR<br>p.L747_A750>P        | 1.00% | p.L747_E749del     | COSM12382 | LOD      | /               |      |
| CP_023_03 | EGFR<br>p.L747_A750>P        | 0.30% | p.L747_E749del     | COSM12382 | LOD      | /               |      |
| CP_023_04 | EGFR<br>p.L747_A750>P        | 0.10% | p.L747_E749del     | COSM12382 | LOD      | /               |      |
| CP_024    | MET gain                     | 3~5   | /                  | /         | positive | MET:c.3082+1G>T |      |
| CP_026_01 | EGFR p.EGFR<br>p.E746_S752>I | 3.00% | p.E746_S752delinsI | COSM12385 | positive | TP53:p.Y220C    |      |
| CP_026_02 | EGFR p.EGFR<br>p.E746_S752>I | 1.00% | p.E746_S752delinsI | COSM12385 | LOD      | TP53:p.Y220C    |      |
| CP_026_03 | EGFR p.EGFR<br>p.E746_S752>I | 0.30% | p.E746_S752delinsI | COSM12385 | LOD      | TP53:p.Y220C    |      |
| CP_026_04 | EGFR p.EGFR                  | 0.10% | p.E746_S752delinsI | COSM12385 | LOD      | TP53:p.Y220C    |      |

---

|        |               |     |   |   |          |                     |
|--------|---------------|-----|---|---|----------|---------------------|
|        | p.E746_S752>1 |     |   |   |          |                     |
| CP_027 | EGFR gain     | 3~5 | / | / | positive | EGFR:p.E746_A750del |

---

Supplementary Table 3 the duplication test results of homogeneity

| No. | Sample ID | mutation     | Designed frequency | Test 1 | Test 2 | Test 3 |
|-----|-----------|--------------|--------------------|--------|--------|--------|
| 1   | CP_001_01 | KRAS p.G12D  | 3.00%              | 4.88%  | 3.50%  | 5.71%  |
| 2   | CP_001_02 | KRAS p.G12D  | 1.00%              | 0.51%  | 1.60%  | 2.19%  |
| 3   | CP_001_03 | KRAS p.G12D  | 0.30%              | 0.14%  | 0.23%  | 1.08%  |
| 4   | CP_001_04 | KRAS p.G12D  | 0.10%              | 0.17%  | 0.26%  | 0.59%  |
| 5   | CP_003_01 | KRAS p.G12C  | 3.00%              | 4.38%  | 5.03%  | 3.11%  |
| 6   | CP_003_02 | KRAS p.G12C  | 1.00%              | 1.28%  | 1.74%  | 1.43%  |
| 7   | CP_003_03 | KRAS p.G12C  | 0.30%              | 0.27%  | 0.16%  | 0.53%  |
| 8   | CP_003_04 | KRAS p.G12C  | 0.10%              | 0.13%  | 0.06%  | 0.31%  |
| 9   | CP_004_01 | KRAS p.G12A  | 3.00%              | 4.08%  | 5.37%  | 2.87%  |
| 10  | CP_004_02 | KRAS p.G12A  | 1.00%              | 1.18%  | 1.34%  | 1.76%  |
| 11  | CP_004_03 | KRAS p.G12A  | 0.30%              | 0.96%  | 0.33%  | 0.26%  |
| 12  | CP_004_04 | KRAS p.G12A  | 0.10%              | 0.47%  | 0.00%  | 0.09%  |
| 13  | CP_005_01 | KRAS p.G13D  | 3.00%              | 2.94%  | 3.78%  | 2.99%  |
| 14  | CP_005_02 | KRAS p.G13D  | 1.00%              | 1.37%  | 1.24%  | 0.85%  |
| 15  | CP_005_03 | KRAS p.G13D  | 0.30%              | 0.24%  | 0.44%  | 0.28%  |
| 16  | CP_005_04 | KRAS p.G13D  | 0.10%              | 0.11%  | 0.74%  | 0.13%  |
| 17  | CP_006_01 | KRAS p.G12S  | 3.00%              | 2.11%  | 4.87%  | 3.71%  |
| 18  | CP_006_02 | KRAS p.G12S  | 1.00%              | 1.47%  | 1.61%  | 0.56%  |
| 19  | CP_006_03 | KRAS p.G12S  | 0.30%              | 0.48%  | 0.62%  | 0.27%  |
| 20  | CP_006_04 | KRAS p.G12S  | 0.10%              | 0.10%  | 0.00%  | 0.28%  |
| 21  | CP_007_01 | KRAS p.G13C  | 3.00%              | 2.35%  | 4.95%  | 2.81%  |
| 22  | CP_007_02 | KRAS p.G13C  | 1.00%              | 0.96%  | 1.28%  | 1.09%  |
| 23  | CP_007_03 | KRAS p.G13C  | 0.30%              | 0.44%  | 1.05%  | 0.62%  |
| 24  | CP_007_04 | KRAS p.G13C  | 0.10%              | 0.07%  | 0.00%  | 0.00%  |
| 25  | CP_009_01 | NRAS p.Q61K  | 3.00%              | 3.06%  | 4.99%  | 4.93%  |
| 26  | CP_009_02 | NRAS p.Q61K  | 1.00%              | 0.99%  | 1.09%  | 0.32%  |
| 27  | CP_009_03 | NRAS p.Q61K  | 0.30%              | 1.09%  | 0.00%  | 0.31%  |
| 28  | CP_009_04 | NRAS p.Q61K  | 0.10%              | 0.07%  | 0.00%  | 0.00%  |
| 29  | CP_010_01 | NRAS p.Q61R  | 3.00%              | 1.28%  | 2.64%  | 3.52%  |
| 30  | CP_010_02 | NRAS p.Q61R  | 1.00%              | 0.98%  | 0.77%  | 1.30%  |
| 31  | CP_010_03 | NRAS p.Q61R  | 0.30%              | 0.53%  | 0.65%  | 0.32%  |
| 32  | CP_010_04 | NRAS p.Q61R  | 0.10%              | 0.08%  | 0.30%  | 0.08%  |
| 33  | CP_012_01 | BRAF p.469A  | 3.00%              | 2.07%  | 1.60%  | 5.71%  |
| 34  | CP_012_02 | BRAF p.469A  | 1.00%              | 0.93%  | 1.17%  | 1.39%  |
| 35  | CP_012_03 | BRAF p.469A  | 0.30%              | 0.21%  | 0.07%  | 0.60%  |
| 36  | CP_012_04 | BRAF p.469A  | 0.10%              | 0.45%  | 0.30%  | 0.06%  |
| 37  | CP_013_01 | BRAF p.L597V | 3.00%              | 2.21%  | 3.33%  | 3.46%  |
| 38  | CP_013_02 | BRAF p.L597V | 1.00%              | 1.32%  | 1.47%  | 1.34%  |
| 39  | CP_013_03 | BRAF p.L597V | 0.30%              | 0.21%  | 0.58%  | 0.64%  |
| 40  | CP_013_04 | BRAF p.L597V | 0.10%              | 0.28%  | 0.04%  | 0.15%  |

|    |           |                    |               |       |       |       |
|----|-----------|--------------------|---------------|-------|-------|-------|
| 41 | CP_014_01 | PI3KCA p.E542K     | 3.00%         | 4.25% | 4.92% | 4.84% |
| 42 | CP_014_02 | PI3KCA p.E542K     | 1.00%         | 1.88% | 2.98% | 1.41% |
| 43 | CP_014_03 | PI3KCA p.E542K     | 0.30%         | 0.53% | 0.28% | 0.53% |
| 44 | CP_014_04 | PI3KCA p.E542K     | 0.10%         | 0.43% | 0.00% | 0.22% |
| 45 | CP_015_01 | PIK3CA p.E545K     | 3.00%         | 3.59% | 5.59% | 5.55% |
| 46 | CP_015_02 | PIK3CA p.E545K     | 1.00%         | 0.71% | 1.28% | 2.91% |
| 47 | CP_015_03 | PIK3CA p.E545K     | 0.30%         | /     | 0.13% | 1.37% |
| 48 | CP_015_04 | PIK3CA p.E545K     | 0.10%         | 0.10% | 0.07% | 0.29% |
| 49 | CP_016_01 | PIK3CA p.H1047R    | 3.00%         | 4.99% | 2.75% | 4.54% |
| 50 | CP_016_02 | PIK3CA p.H1047R    | 1.00%         | 0.59% | 0.43% | 1.19% |
| 51 | CP_016_03 | PIK3CA p.H1047R    | 0.30%         | 0.40% | 0.98% | 0.52% |
| 52 | CP_016_04 | PIK3CA p.H1047R    | 0.10%         | 0.14% | 0.34% | 0.35% |
| 53 | CP_017_01 | PIK3CA p.H1047L    | 3.00%         | 3.64% | 3.36% | 4.68% |
| 54 | CP_017_02 | PIK3CA p.H1047L    | 1.00%         | 1.09% | 0.35% | 0.76% |
| 55 | CP_017_03 | PIK3CA p.H1047L    | 0.30%         | 0.37% | 0.70% | 0.56% |
| 56 | CP_017_04 | PIK3CA p.H1047L    | 0.10%         | 0.21% | 0.31% | 0.33% |
| 57 | CP_018_01 | EGFR p.T790M       | 3.00%         | 3.34% | 3.17% | 4.21% |
| 58 | CP_018_02 | EGFR p.T790M       | 1.00%         | 0.86% | 1.67% | 1.47% |
| 59 | CP_018_03 | EGFR p.T790M       | 0.30%         | 1.41% | 0.43% | 0.42% |
| 60 | CP_018_04 | EGFR p.T790M       | 0.10%         | 0.39% | 0.24% | 0.28% |
| 61 | CP_019_01 | EGFR p.G719S       | 3.00%         | 3.51% | 2.95% | 2.78% |
| 62 | CP_019_02 | EGFR p.G719S       | 1.00%         | 1.97% | 2.04% | 1.93% |
| 63 | CP_019_03 | EGFR p.G719S       | 0.30%         | 0.29% | 0.24% | 0.21% |
| 64 | CP_019_04 | EGFR p.G719S       | 0.10%         | 0.23% | 0.39% | 0.48% |
| 65 | CP_020_01 | EGFR p.L858R       | 3.00%         | 3.96% | 3.60% | 4.80% |
| 66 | CP_020_02 | EGFR p.L858R       | 1.00%         | 1.61% | 1.61% | 1.27% |
| 67 | CP_020_03 | EGFR p.L858R       | 0.30%         | 0.44% | 0.17% | 0.30% |
| 68 | CP_020_04 | EGFR p.L858R       | 0.10%         | 0.30% | 0.29% | 0.20% |
| 69 | CP_022_01 | EGFR p.E746A750del | 3.00%         | 1.62% | 4.27% | 3.75% |
| 70 | CP_022_02 | EGFR p.E746A750del | 1.00%         | 0.00% | 1.50% | 0.67% |
| 71 | CP_022_03 | EGFR p.E746A750del | 0.30%         | 0.43% | 1.18% | 0.51% |
| 72 | CP_022_04 | EGFR p.E746A750del | 0.10%         | 0.39% | 0.81% | 0.86% |
| 73 | CP_023_01 | EGFR p.L747_A750>P | 3.00%         | 3.15% | 3.29% | 4.89% |
| 74 | CP_023_02 | EGFR p.L747_A750>P | 1.00%         | 1.18% | 1.43% | 1.57% |
| 75 | CP_023_03 | EGFR p.L747_A750>P | 0.30%         | 0.58% | 0.50% | 0.68% |
| 76 | CP_023_04 | EGFR p.L747_A750>P | 0.10%         | 0.16% | 0.27% | 0.13% |
| 77 | CP_024    | MET gain           | 3~5<br>copies | 5.10  | 6.02  | 6.10  |
| 78 | CP_027    | EGFR gain          | 3~5<br>copies | 6.77  | 5.67  | 6.86  |
| 79 | CP_000    | Wild type          | -             | -     | -     | -     |
| 80 | CP_011_01 | BRAF p.V600E       | 3.00%         | 5.39% | 6.42% | 5.77% |
| 81 | CP_011_02 | BRAF p.V600E       | 1.00%         | 1.61% | 1.84% | 3.12% |

|           |           |                              |       |       |       |       |
|-----------|-----------|------------------------------|-------|-------|-------|-------|
| <b>82</b> | CP_011_03 | BRAF p.V600E                 | 0.30% | 0.51% | 0.59% | 0.73% |
| <b>83</b> | CP_011_04 | BRAF p.V600E                 | 0.10% | 0.32% | 0.54% | 0.64% |
| <b>84</b> | CP_026_01 | EGFR p.EGFR<br>p.E746_S752>I | 3.00% | 6.36% | 2.80% | 5.32% |
| <b>85</b> | CP_026_02 | EGFR p.EGFR<br>p.E746_S752>I | 1.00% | 1.86% | 1.69% | 2.38% |
| <b>86</b> | CP_026_03 | EGFR p.EGFR<br>p.E746_S752>I | 0.30% | 0.93% | 1.08% | 1.08% |
| <b>87</b> | CP_026_04 | EGFR p.EGFR<br>p.E746_S752>I | 0.10% | 0.18% | 0.25% | 0.25% |



Supplementary Table 4 collaborative evaluation of the cfDNA RMs by NGS

| No. | Sample ID | Designed frequency | BGI   | Geneplus | Genetron Health | Amoy Diagnostics | Geneseeq |
|-----|-----------|--------------------|-------|----------|-----------------|------------------|----------|
| 1   | CP_001_01 | 3.00%              | 4.88% | 2.70%    | 3.54%           | 5.33%            | 2.95%    |
| 2   | CP_001_02 | 1.00%              | 0.51% | 1.50%    | 1.35%           | 2.17%            | 1.07%    |
| 3   | CP_001_03 | 0.30%              | 0.14% | 0.57%    | 0.51%           | 0.53%            | 0.32%    |
| 4   | CP_001_04 | 0.10%              | 0.17% | 0.24%    | 0.18%           | 0.25%            | 0.17%    |
| 5   | CP_003_01 | 3.00%              | 4.38% | 3.28%    | 3.30%           | 6.22%            | 4.20%    |
| 6   | CP_003_02 | 1.00%              | 1.28% | 1.32%    | 1.49%           | 1.65%            | 0.73%    |
| 7   | CP_003_03 | 0.30%              | 0.27% | 0.61%    | 0.64%           | 0.43%            | 0.80%    |
| 8   | CP_003_04 | 0.10%              | 0.13% | -        | 0.32%           | -                | 0.33%    |
| 9   | CP_004_01 | 3.00%              | 4.08% | 2.76%    | 3.05%           | 4.54%            | 3.32%    |
| 10  | CP_004_02 | 1.00%              | 1.18% | 0.97%    | 0.99%           | 2.48%            | 0.75%    |
| 11  | CP_004_03 | 0.30%              | 0.96% | 0.30%    | 0.29%           | 0.55%            | 0.38%    |
| 12  | CP_004_04 | 0.10%              | 0.47% | 0.33%    | 0.14%           | 0.56%            | 0.09%    |
| 13  | CP_005_01 | 3.00%              | 2.94% | 2.07%    | 5.02%           | 4.04%            | 3.16%    |
| 14  | CP_005_02 | 1.00%              | 1.37% | 1.17%    | 1.49%           | 1.16%            | 0.66%    |
| 15  | CP_005_03 | 0.30%              | 0.24% | 0.22%    | 0.42%           | 0.32%            | 0.21%    |
| 16  | CP_005_04 | 0.10%              | 0.11% | 0.23%    | 0.24%           | 0.14%            | 0.06%    |
| 17  | CP_006_01 | 3.00%              | 2.11% | 2.03%    | 3.89%           | 4.79%            | 2.91%    |
| 18  | CP_006_02 | 1.00%              | 1.47% | 0.61%    | 1.45%           | 1.88%            | 1.01%    |
| 19  | CP_006_03 | 0.30%              | 0.48% | 0.23%    | 0.32%           | 0.49%            | 0.50%    |
| 20  | CP_006_04 | 0.10%              | 0.10% | 0.12%    | 0.20%           | 0.23%            | 0.20%    |
| 21  | CP_007_01 | 3.00%              | 2.35% | 3.21%    | 2.27%           | 5.00%            | 4.15%    |
| 22  | CP_007_02 | 1.00%              | 0.96% | 1.19%    | 0.98%           | 1.20%            | 1.53%    |
| 23  | CP_007_03 | 0.30%              | 0.44% | 0.28%    | 0.32%           | 0.80%            | 0.44%    |
| 24  | CP_007_04 | 0.10%              | 0.07% | 0.15%    | 0.00%           | 0.19%            | -        |
| 25  | CP_009_01 | 3.00%              | 3.06% | 3.21%    | 5.39%           | 3.67%            | 4.67%    |
| 26  | CP_009_02 | 1.00%              | 0.99% | 1.34%    | 1.56%           | 1.12%            | 1.00%    |
| 27  | CP_009_03 | 0.30%              | 1.09% | 0.45%    | 0.59%           | 0.68%            | 0.22%    |
| 28  | CP_009_04 | 0.10%              | 0.07% | 0.19%    | 0.26%           | -                | -        |
| 29  | CP_010_01 | 3.00%              | 1.28% | 2.45%    | 5.45%           | 3.16%            | 3.31%    |
| 30  | CP_010_02 | 1.00%              | 0.98% | 0.75%    | 1.67%           | 0.99%            | 0.86%    |
| 31  | CP_010_03 | 0.30%              | 0.53% | 0.51%    | fail            | 0.24%            | 0.18%    |
| 32  | CP_010_04 | 0.10%              | 0.08% | -        | 0.29%           | -                | -        |
| 33  | CP_012_01 | 3.00%              | 2.07% | 2.82%    | 3.87%           | 3.91%            | 3.86%    |
| 34  | CP_012_02 | 1.00%              | 0.93% | 0.91%    | 1.28%           | 1.42%            | 1.71%    |
| 35  | CP_012_03 | 0.30%              | 0.21% | 0.53%    | 0.81%           | 0.80%            | 0.57%    |
| 36  | CP_012_04 | 0.10%              | 0.45% | 0.31%    | 0.06%           | -                | 0.11%    |
| 37  | CP_013_01 | 3.00%              | 2.21% | 2.63%    | 4.06%           | 3.39%            | 2.53%    |
| 38  | CP_013_02 | 1.00%              | 1.32% | 1.08%    | 1.20%           | 1.34%            | 0.86%    |
| 39  | CP_013_03 | 0.30%              | 0.21% | 0.39%    | 0.34%           | 0.56%            | 0.60%    |

|    |           |                    |       |          |        |       |       |
|----|-----------|--------------------|-------|----------|--------|-------|-------|
| 40 | CP_013_04 | 0.10%              | 0.28% | 0.47%    | 0.00%  | 0.12% | -     |
| 41 | CP_014_01 | 3.00%              | 4.25% | 2.71%    | 3.48%  | 3.03% | 3.97% |
| 42 | CP_014_02 | 1.00%              | 1.88% | 1.18%    | 1.27%  | 1.59% | 1.57% |
| 43 | CP_014_03 | 0.30%              | 0.53% | 0.30%    | 0.19%  | 0.31% | 0.20% |
| 44 | CP_014_04 | 0.10%              | 0.43% | 0.22%    | 0.20%  | 0.29% | 0.25% |
| 45 | CP_015_01 | 3.00%              | 3.59% | 2.20%    | 3.96%  | 4.06% | 3.69% |
| 46 | CP_015_02 | 1.00%              | 0.71% | 0.77%    | 1.25%  | 1.62% | 1.23% |
| 47 | CP_015_03 | 0.30%              | /     | 0.37%    | 0.50%  | 0.70% | 0.36% |
| 48 | CP_015_04 | 0.10%              | 0.10% | 0.10%    | 0.10%  | -     | -     |
| 49 | CP_016_01 | 3.00%              | 4.99% | 2.92%    | 6.88%  | 4.40% | 3.06% |
| 50 | CP_016_02 | 1.00%              | 0.59% | 0.80%    | 1.86%  | 1.78% | 0.97% |
| 51 | CP_016_03 | 0.30%              | 0.40% | 0.31%    | 0.64%  | 0.29% | 0.50% |
| 52 | CP_016_04 | 0.10%              | 0.14% | 0.24%    | 0.13%  | 0.14% | 0.11% |
| 53 | CP_017_01 | 3.00%              | 3.64% | 2.07%    | 2.96%  | 4.07% | 3.74% |
| 54 | CP_017_02 | 1.00%              | 1.09% | 1.00%    | 1.22%  | 1.68% | 1.53% |
| 55 | CP_017_03 | 0.30%              | 0.37% | 0.55%    | 0.27%  | 0.44% | 0.55% |
| 56 | CP_017_04 | 0.10%              | 0.21% | 0.09%    | 0.20%  | 0.34% | -     |
| 57 | CP_018_01 | 3.00%              | 3.34% | 2.42%    | 3.32%  | 3.83% | 3.65% |
| 58 | CP_018_02 | 1.00%              | 0.86% | 0.62%    | 1.36%  | 1.23% | 1.10% |
| 59 | CP_018_03 | 0.30%              | 1.41% | 0.37%    | 0.41%  | 0.43% | 0.49% |
| 60 | CP_018_04 | 0.10%              | 0.39% | 0.15%    | 0.17%  | 0.24% | 0.14% |
| 61 | CP_019_01 | 3.00%              | 3.51% | 2.46%    | 5.35%  | 4.69% | 4.83% |
| 62 | CP_019_02 | 1.00%              | 1.97% | 0.75%    | 1.84%  | 1.46% | 0.98% |
| 63 | CP_019_03 | 0.30%              | 0.29% | 0.61%    | 0.88%  | 0.45% | 0.46% |
| 64 | CP_019_04 | 0.10%              | 0.23% | 0.29%    | 0.24%  | -     | 0.11% |
| 65 | CP_020_01 | 3.00%              | 3.96% | 2.40%    | 2.25%  | 4.87% | 4.58% |
| 66 | CP_020_02 | 1.00%              | 1.61% | 1.32%    | 0.51%  | 1.87% | 1.56% |
| 67 | CP_020_03 | 0.30%              | 0.44% | 0.49%    | 0.28%  | 0.56% | 0.51% |
| 68 | CP_020_04 | 0.10%              | 0.30% | 0.29%    | 0.08%  | 0.32% | 0.36% |
| 69 | CP_022_01 | 3.00%              | 1.62% | 1.73%    | 5.81%  | 3.49% | 2.82% |
| 70 | CP_022_02 | 1.00%              | 0.00% | 0.55%    | 1.56%  | 1.12% | 0.72% |
| 71 | CP_022_03 | 0.30%              | 0.43% | 0.32%    | 0.49%  | 0.37% | 0.54% |
| 72 | CP_022_04 | 0.10%              | 0.39% | 0.22%    | 0.13%  | 0.19% | 0.11% |
| 73 | CP_023_01 | 3.00%              | 3.15% | 1.66%    | 5.09%  | 4.84% | 4.21% |
| 74 | CP_023_02 | 1.00%              | 1.18% | 0.56%    | 1.65%  | 1.20% | 1.66% |
| 75 | CP_023_03 | 0.30%              | 0.58% | 0.14%    | 0.24%  | 0.39% | 0.49% |
| 76 | CP_023_04 | 0.10%              | 0.16% | 0.15%    | 0.13%  | -     | 0.07% |
| 77 | CP_024    | Gain:3~5           | 5.10  | Gain:4-7 | Gain:3 | -     | 2.8   |
| 78 | CP_027    | Gain:3~5<br>copies | 6.77  | Gain:4-8 | Gain:4 | -     | 2.9   |
| 79 | CP_000    | wild type          | -     | -        | -      | -     | -     |
| 80 | CP_011_01 | 3.00%              | 5.39% | 3.54%    | 5.48%  | 5.17% | 4.87% |
| 81 | CP_011_02 | 1.00%              | 1.61% | 1.51%    | 2.55%  | 1.81% | 1.84% |

|    |           |       |       |       |       |       |       |
|----|-----------|-------|-------|-------|-------|-------|-------|
| 82 | CP_011_03 | 0.30% | 0.51% | 0.51% | 0.91% | 0.47% | 0.66% |
| 83 | CP_011_04 | 0.10% | 0.32% | 0.17% | 0.15% | 0.42% | 0.15% |
| 84 | CP_026_01 | 3.00% | 6.36% | 1.16% | 5.14% | 3.64% | 2.09% |
| 85 | CP_026_02 | 1.00% | 1.86% | 0.28% | 1.37% | 0.96% | 1.04% |
| 86 | CP_026_03 | 0.30% | 0.93% | 0.15% | 0.41% | 0.56% | 0.30% |
| 87 | CP_026_04 | 0.10% | 0.18% | -     | 0.15% | 0.10% | 0.15% |
